# Supplementary material
Source: publisher figshare collection journal article supplement (https://sage.figshare.com/ndownloader/files/18028019)
Supplement: Supplementary file 1 [file 18028019]

**Dermatology Clinical Skills Session – Student Questionnaire**

This questionnaire is anonymous. Thank you for your feedback!

|  | **Strongly Disagree** |  |  |  | **Strongly Agree** |
| --- | --- | --- | --- | --- | --- |
| The topics presented were interesting | 1 | 2 | 3 | 4 | 5 |
| The topics were relevant to my understanding of dermatology | 1 | 2 | 3 | 4 | 5 |
| The resources provided to me were helpful | 1 | 2 | 3 | 4 | 5 |
| The clinical skills session facilitated interaction between the tutor and students | 1 | 2 | 3 | 4 | 5 |
| I felt motivated to actively participate in the clinical skills session | 1 | 2 | 3 | 4 | 5 |
| Clinical skills sessions are useful for consolidation of information | 1 | 2 | 3 | 4 | 5 |
| Interactive teaching in the clinical skills session makes learning more exciting | 1 | 2 | 3 | 4 | 5 |
| Having a clinical skills session with a tutor in the specialty of dermatology was helpful to my learning | 1 | 2 | 3 | 4 | 5 |
| The clinical skills session improved my ability to develop an approach to a dermatological patient | 1 | 2 | 3 | 4 | 5 |
| After the clinical skills session, I feel more confident performing a dermatologic history on a patient | 1 | 2 | 3 | 4 | 5 |
| After the clinical skills session, I feel more confident performing a full skin examination on a patient | 1 | 2 | 3 | 4 | 5 |
| After the clinical skills session, I am more confident describing skin findings with proper morphological terms | 1 | 2 | 3 | 4 | 5 |
| I enjoyed this clinical skills session | 1 | 2 | 3 | 4 | 5 |

**Please provide us with some feedback about how you felt the session went (positive or negative feedback), as well as any specific suggestions for improvement.**
